# Supplementary material for: Facile synthesis of Bi2S3–C composite microspheres as low-cost counter electrodes for dye-sensitized solar cells
Source: Royal Society of Chemistry journal article supplement (doi:10.1039/c4ra08284b), 2014-01-01
Supplement: c4ra08284b1.pdf [file c4ra08284b1.pdf]

## Supplementary information

### Facile synthesis of $\text{Bi}_2\text{S}_3\text{-C}$ composite microspheres as low-cost counter electrodes for dye-sensitized solar cells

Xue-Qin Zuo, Xiao Yang, Lei Zhou, Bo Yang, Guang Li, Huai-Bao Tang, Hai-Jun Zhang, Ming-Zai Wu, Yong-Qing Ma and Shao-Wei Jin

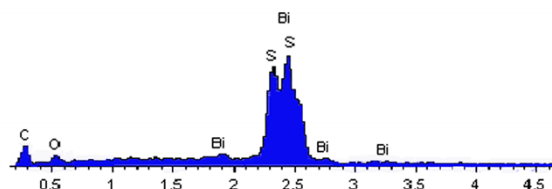

Fig.S1 EDS of the  $\text{Bi}_2\text{S}_3\text{-C}$  composite material.

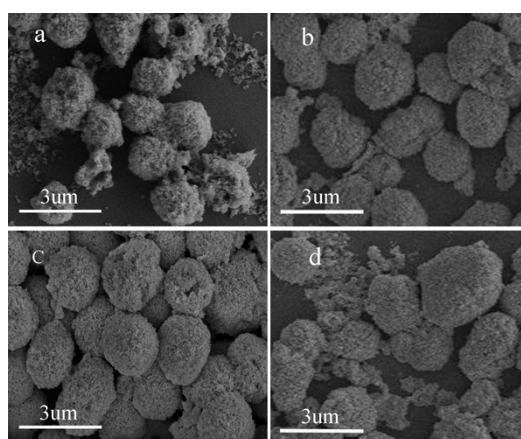

Fig.S2 SEM images of (a)  $\text{Bi}_2\text{S}_3\text{-0.39-C}$  (b)  $\text{Bi}_2\text{S}_3\text{-0.77-C}$  (c)  $\text{Bi}_2\text{S}_3\text{-1.53-C}$  and (d)  $\text{Bi}_2\text{S}_3\text{-2.28-C}$ .

The effect of the contents of carbon on the morphology of  $\text{Bi}_2\text{S}_3\text{-C}$  was investigated by SEM. As shown in Fig. S2, all of the samples exhibits the structure of porous microspheres. But the samples of  $\text{Bi}_2\text{S}_3\text{-0.77-C}$  and  $\text{Bi}_2\text{S}_3\text{-1.53-C}$  possess relatively homogeneous microspheres than the samples of  $\text{Bi}_2\text{S}_3\text{-0.39-C}$  and  $\text{Bi}_2\text{S}_3\text{-2.28-C}$ . This suggests that incorporation of suitable carbon is beneficial to gain homogeneous  $\text{Bi}_2\text{S}_3\text{-C}$  microspheres.

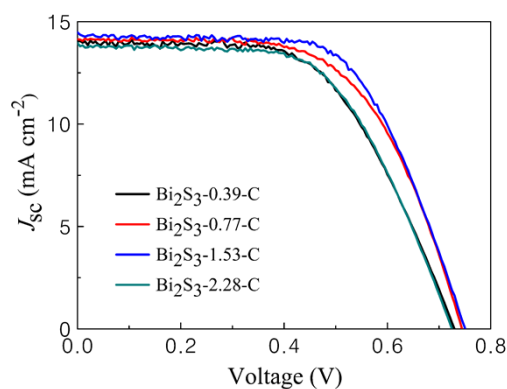

**Fig.S3**  $J$ - $V$  curves of DSSCs fabricated with different CEs of various contents of carbon.

Fig. S3 depicts the  $J$ - $V$  curves for different CEs of various contents of carbon. The conversion efficiency of different samples are 5.89%, 6.36%, 6.72% and 5.88%, respectively. It can be found that the conversion efficiency of DSSCs increased with increasing the carbon content from 0.39 wt.% to 1.53 wt.%, and then decreased with further increasing the carbon content. This indicates that the catalytic abilities can be improved by the incorporation of suitable carbon.

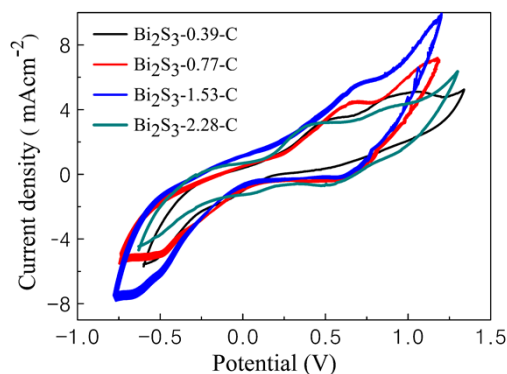

**Fig.S4** Cyclic voltammograms (CVs) for the  $\text{Bi}_2\text{S}_3$ -C electrodes with different carbon contents.

Fig. S4 presents CV curves of the  $\text{Bi}_2\text{S}_3$ -C electrodes with different carbon contents. Obviously, the sample of  $\text{Bi}_2\text{S}_3$ -1.53-C demonstrates a superior catalytic activity than the other samples.

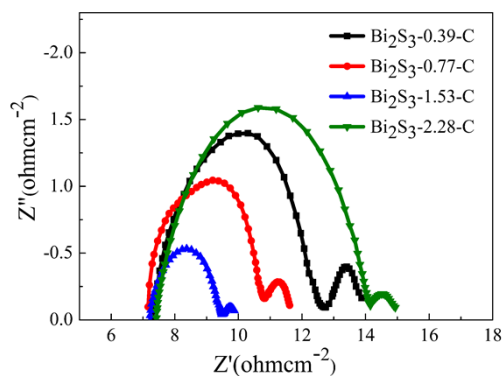

**Fig.S5** Nyquist plots of EIS for symmetric cells fabricated with different CEs of various carbon content.

Fig. S5 shows the EIS for symmetric cells with CEs of different contents of carbon. Particularly, the sample of Bi<sub>2</sub>S<sub>3</sub>-1.53-C demonstrates a smallest  $R_{ct}$  among all hybrid electrode, hinting excellent electrocatalytic activity.

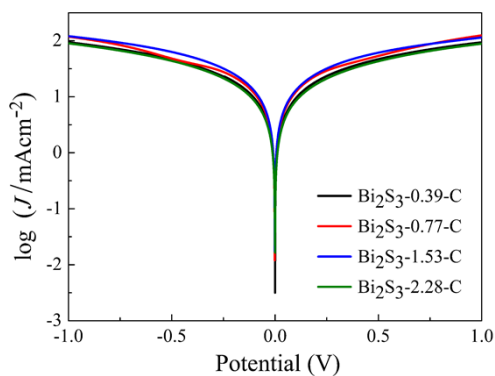

**Fig.S6** Tafel-polarization curves for different CEs of various contents of carbon.

Fig. S6 exhibits the Tafel-polarization curves for different CEs of various contents of carbon. It can be found that the composite CE with 1.53wt.% carbon content show the largest  $J_0$  and highest  $J_{lim}$  than other samples, which indicates the sample of Bi<sub>2</sub>S<sub>3</sub>-1.53-C demonstrate the most excellent catalytic activity for I<sub>3</sub><sup>-</sup> reduction.
